# Supplementary material
Source: publisher figshare collection journal article supplement (https://gsapubs.figshare.com/ndownloader/files/23316725)
Supplement: Supplementary file 1 [file 23316725]

## Sheet: AFT ages eff Cl EMPA sort (2)
Table S1. Summary of AFT age data, Imperial Formation, Mackenzie Plain, NWT, Canada
					one		FT	one				meas.	meas.	calc.
A2Z Sample	Ns	Wi	Pi	PiWi	sigma	sPi2Wi2	age	sigma	Etch	Dpar	U	F	Cl	OH	rmr0
No.		(cm2)	(dmnls)		(dmnls)		(Ma)	(Ma)	Figs.	(µm)	(ppm)	(apfu)	(apfu)	(apfu)
JPCPC3, Imperial Fm. (siltstone) Powell River section, ~0.70 %Ro, 65.277 N, 128.774 W
Kinetic population #1 (rmr0 > 0.76)
P1420_003_Ap_A_1_POS_36	9	3.3975e-05	0.022411	7.61414e-07	0.0020228	4.72307e-15	97.0501	33.5556	2	1.76	2	1.9819	0.0066	0.0115	0.857
P1420_003_Ap_A_1_POS_9	44	2.3297e-05	0.37713	8.786e-06	0.011935	7.73116e-14	41.2969	6.40009	4	2.07	50	2.0264	0	0	0.8547
P1420_003_Ap_A_1_POS_37	2	3.3975e-05	0.01112	3.77802e-07	0.0012019	1.66746e-15	43.6458	31.2295	2	1.92	1	2.0554	0	0	0.8486
P1420_003_Ap_A_1_POS_17	4	1.6987e-05	0.040166	6.823e-07	0.0025287	1.84513e-15	48.3174	24.3633	3	2.29	5	1.7245	0.0082	0.2673	0.8451
P1420_003_Ap_A_1_POS_10	13	1.9414e-05	0.17313	3.36115e-06	0.0073921	2.05952e-14	31.9174	8.97302	4	2.04	24	1.5742	0.0015	0.4243	0.8422
P1420_003_Ap_A_1_POS_29	14	2.1841e-05	0.068185	1.48923e-06	0.002939	4.12045e-15	77.305	20.9689	4	2.2	7	1.6208	0.0174	0.3618	0.8384
P1420_003_Ap_A_1_POS_34	8	1.7473e-05	0.091304	1.59535e-06	0.0031744	3.07651e-15	41.351	14.7071	2	2.02	11	1.8218	0.0631	0.115	0.8354
P1420_003_Ap_A_1_POS_5	32	3.8828e-05	0.10137	3.93599e-06	0.0053411	4.30082e-14	66.9094	12.3946	4	2.16	12	1.5073	0.0218	0.4709	0.8335
P1420_003_Ap_A_1_POS_24	14	2.3782e-05	0.081999	1.9501e-06	0.0038364	8.32424e-15	59.1188	16.0719	4	1.94	11	1.8679	0.0234	0.1087	0.8331
P1420_003_Ap_A_1_POS_14	1	2.3297e-05	0.016108	3.75268e-07	0.0010462	5.94059e-16	22.0072	22.0567	2	2.85	2	1.7519	0.0423	0.2058	0.8303
P1420_003_Ap_A_1_POS_39	4	2.718e-05	0.033527	9.11264e-07	0.0020097	2.98374e-15	36.2112	18.2456	2	1.87	4	1.7222	0.0718	0.206	0.8177
P1420_003_Ap_A_1_POS_20	11	9.707e-06	0.13335	1.29443e-06	0.0043095	1.74994e-15	69.9205	21.2359	2	1.94	17	1.1557	0.0297	0.8146	0.8167
P1420_003_Ap_A_1_POS_16	16	2.3297e-05	0.11012	2.56547e-06	0.0032902	5.8755e-15	51.3888	12.9681	3	2.2	13	0.6196	0.1208	1.2596	0.8012
P1420_003_Ap_A_1_POS_7	4	2.4268e-05	0.015001	3.64044e-07	0.0012376	9.02046e-16	90.2628	45.7674	2	1.9	2	1.8129	0.0478	0.1393	0.7947
P1420_003_Ap_A_1_POS_15	2	1.7473e-05	0.028275	4.94049e-07	0.0025745	2.02358e-15	33.4027	23.8211	2	2.33	3	1.7326	0.0803	0.1871	0.7927
P1420_003_Ap_A_1_POS_33	8	2.9121e-05	0.029886	8.7031e-07	0.002628	5.85684e-15	75.5987	27.5725	3	2.32	4	1.9265	0.0992	0	0.7831
P1420_003_Ap_A_1_POS_19	130	3.1062e-05	0.75565	2.3472e-05	0.024951	6.00668e-13	45.6564	4.3486	2	2.71	83	1.1802	0.1831	0.6367	0.7825
P1420_003_Ap_A_1_POS_25	1	2.9121e-05	0.0039808	1.15925e-07	0.00046529	1.83595e-16	70.9705	71.4638	1	2.52	0	1.3074	0.0282	0.6644	0.7815
P1420_003_Ap_A_1_POS_11	3	2.4268e-05	0.0073316	1.77923e-07	0.00067439	2.67849e-16	138	80.7133	2	1.82	1	1.7792	0.1507	0.0701	0.7692
P1420_003_Ap_A_1_POS_6	2	1.9414e-05	0.01137	2.20737e-07	0.0011315	4.82546e-16	74.5228	53.23	4	2.39	1	1.3851	0.0532	0.5616	0.7648
P1420_003_Ap_A_1_POS_8	3	2.3297e-05	0.022263	5.18661e-07	0.0019847	2.13791e-15	47.6736	27.8624	2	3.09	3	1.403	0.4243	0.1727	0.7276
P1420_003_Ap_A_1_POS_0	11	1.9414e-05	0.054386	1.05585e-06	0.00224	1.89115e-15	85.6152	26.0943	3	2.75	6	0.9958	0.1564	0.8478	0.7223
P1420_003_Ap_A_1_POS_35	5	3.1062e-05	0.021487	6.67429e-07	0.0013413	1.73584e-15	61.6784	27.8706	3	2.58	3	1.1111	0.2059	0.683	0.715
P1420_003_Ap_A_1_POS_28	2	1.7473e-05	0.017472	3.05288e-07	0.0014885	6.76445e-16	53.9694	38.4491	1	2.46	3	1.1414	0.3419	0.5167	0.6852
pooled (24) Q=27%	343	0.000579026		5.6348e-05		7.92701e-13	50.1617	2.9482		2.25542		1.5502	0.0907333	0.363538	0.798854
Kinetic population #2 (rmr0 < 0.76)
P1420_003_Ap_A_1_POS_2	15	1.7473e-05	0.042105	7.35701e-07	0.0024254	1.79598e-15	166.501	44.1382	4	2.18	5	1.2148	0.1372	0.6481	0.7801
P1420_003_Ap_A_1_POS_27	8	1.1648e-05	0.025351	2.95288e-07	0.0015275	3.16567e-16	220.317	79.1058	4	20.37	3	1.7327	0.1906	0.0767	0.7512
P1420_003_Ap_A_1_POS_21	13	1.6987e-05	0.047343	8.04216e-07	0.0020069	1.16221e-15	132.359	37.2041	1	2.4	6	0.9741	0.3246	0.7013	0.6692
P1420_003_Ap_A_1_POS_22	14	1.9414e-05	0.029047	5.63918e-07	0.0016708	1.05215e-15	202.177	55.3781	4	3.18	3	1.0522	0.348	0.5998	0.6577
pooled (4) Q=62%	50	6.5522e-05		2.39912e-06		4.32691e-15	170.146	24.6805		2.58667		1.24345	0.2501	0.506475	0.71455
JPCPC4, Imperial Fm. (siltstone) Imperial River section, ~0.66 %Ro, 65.116 N, 127.859 W
Kinetic population #1 (rmr0 > 0.82)
P1420_004_Ap_A_1_POS_16	6	2.9121e-05	0.068022	1.98087e-06	0.0028752	7.0105e-15	25.0092	10.2734	1	1.47	8	1.8864	0	0.1136	0.8527
P1420_004_Ap_A_1_POS_6	13	2.718e-05	0.058093	1.57897e-06	0.0036881	1.00486e-14	67.7537	19.3119	4	2.17	7	2.0625	0.0119	0	0.8476
P1420_004_Ap_A_1_POS_33	15	2.9121e-05	0.071301	2.07636e-06	0.0049713	2.09581e-14	59.4883	15.9421	4	2.25	8	1.7188	0.0078	0.2733	0.8393
P1420_004_Ap_A_1_POS_39	39	3.1062e-05	0.23135	7.18619e-06	0.0074912	5.41454e-14	44.7409	7.34879	4	1.9	26	2.0957	0.0139	0	0.8345
P1420_004_Ap_A_1_POS_12	20	2.9121e-05	0.14492	4.22022e-06	0.0054115	2.48341e-14	39.0864	8.88591	4	2.48	17	1.6388	0.0378	0.3234	0.8308
P1420_004_Ap_A_1_POS_4	42	1.7473e-05	0.39756	6.94657e-06	0.012807	5.0076e-14	49.825	7.8995	4	1.79	43	1.6607	0.0138	0.3255	0.8262
P1420_004_Ap_A_1_POS_9	2	1.7473e-05	0.040955	7.15607e-07	0.0024769	1.87306e-15	23.0794	16.3839	1	1.9	5	1.973	0.0502	0	0.8238
pooled (7) Q=34%	137	0.000180551		2.47048e-05		1.68946e-13	45.7137	4.0542		1.99429		1.86227	0.0193429	0.147971	0.836414
Kinetic population #2 (0.76 < rmr0 < 0.82)
P1420_004_Ap_A_1_POS_14	11	4.3682e-05	0.021749	9.5004e-07	0.0022608	9.7528e-15	95.0805	30.3669	3	1.85	2	1.9358	0	0.0642	0.8555
P1420_004_Ap_A_1_POS_17	9	1.7473e-05	0.047527	8.30439e-07	0.002899	2.56585e-15	89.0388	30.2104	2	1.66	6	1.7612	0.0599	0.1788	0.8221
P1420_004_Ap_A_1_POS_3	11	2.3297e-05	0.046156	1.0753e-06	0.0028776	4.49429e-15	84.0769	25.9259	3	2.17	6	1.2186	0.0216	0.7598	0.8195
P1420_004_Ap_A_1_POS_18	6	3.3975e-05	0.0076997	2.61597e-07	0.00050246	2.91422e-16	187.004	77.3786	1	2.27	1	1.9402	0.0812	0	0.8174
P1420_004_Ap_A_1_POS_0	8	3.3975e-05	0.0091886	3.12183e-07	0.0036894	1.5712e-14	208.585	111.648	2	2.62	1	2.0361	0.0817	0	0.8163
P1420_004_Ap_A_1_POS_2	3	3.1062e-05	0.0075845	2.3559e-07	0.00064985	4.0746e-16	104.493	61.0157	1	2.31	1	1.2985	0.0508	0.6507	0.8128
P1420_004_Ap_A_1_POS_5	28	1.7473e-05	0.13894	2.4277e-06	0.0050003	7.63356e-15	94.7144	18.2921	4	1.9	18	1.5116	0.023	0.4654	0.8115
P1420_004_Ap_A_1_POS_29	4	2.9121e-05	0.011476	3.34193e-07	0.0014481	1.77832e-15	98.2644	50.7002	2	2.22	1	1.2307	0.0032	0.7661	0.8097
P1420_004_Ap_A_1_POS_30	9	2.9121e-05	0.04554	1.32617e-06	0.0014739	1.84225e-15	55.8993	18.7448	4	2.11	5	1.9809	0.0419	0	0.8074
P1420_004_Ap_A_1_POS_7	4	2.3782e-05	0.023551	5.6009e-07	0.0012791	9.25349e-16	58.8121	29.5959	2	1.88	3	2.0119	0.114	0	0.8058
P1420_004_Ap_A_1_POS_15	62	2.9121e-05	0.23443	6.82684e-06	0.0096023	7.81921e-14	74.6966	10.0483	4	2.17	27	1.0848	0.0601	0.855	0.8024
P1420_004_Ap_A_1_POS_20	1	1.7473e-05	0.0086464	1.51079e-07	0.00097385	2.89547e-16	54.5264	54.879	1	1.84	1	1.6768	0.0431	0.2801	0.7995
P1420_004_Ap_A_1_POS_34	4	3.1062e-05	0.0067245	2.08876e-07	0.00061103	3.60233e-16	156.508	79.58	2	2.48	1	1.2013	0.1629	0.6358	0.791
P1420_004_Ap_A_1_POS_32	15	1.7473e-05	0.071509	1.24948e-06	0.0025262	1.94837e-15	98.5567	25.739	2	2.36	8	0.853	0.1258	1.0212	0.7716
pooled (14) Q=53%	175	0.00037809		1.67496e-05		1.26194e-13	85.8591	6.8973		2.13143		1.55296	0.0620857	0.405507	0.810179
Kinetic population #3 (rmr0 < 0.76)
P1420_004_Ap_A_1_POS_31	20	3.1062e-05	0.010577	3.28543e-07	0.0010235	1.01073e-15	484.897	118.431	3	3.06	2	0.6214	0.0168	1.3618	0.8056
P1420_004_Ap_A_1_POS_11	11	2.9121e-05	0.013308	3.87542e-07	0.0018189	2.80563e-15	230.637	76.4515	3	1.92	1	1.4438	0.081	0.4752	0.7845
P1420_004_Ap_A_1_POS_28	32	4.8535e-05	0.023572	1.14407e-06	0.0016583	6.47793e-15	227.335	43.4253	4	2.13	3	1.4344	0.0478	0.5178	0.7773
P1420_004_Ap_A_1_POS_8	12	2.4268e-05	0.014573	3.53658e-07	0.0017499	1.80341e-15	274.762	86.0324	3	2.23	2	1.3472	0.0813	0.5715	0.7724
P1420_004_Ap_A_1_POS_36	4	2.9121e-05	0.0031551	9.18797e-08	0.00047741	1.93284e-16	350.453	183.172	2	1.95	1	1.5366	0.0523	0.4111	0.7627
P1420_004_Ap_A_1_POS_24	73	3.8828e-05	0.0698	2.71019e-06	0.0029933	1.3508e-14	219.063	27.5593	4	2.5	9	1.1474	0.1644	0.6882	0.7613
P1420_004_Ap_A_1_POS_10	26	1.7473e-05	0.044095	7.70472e-07	0.0022116	1.4933e-15	273.291	55.5167	3	2.4	5	0.6048	0.1936	1.2016	0.7546
P1420_004_Ap_A_1_POS_38	16	3.3975e-05	0.021491	7.30157e-07	0.0022096	5.63568e-15	178.778	48.4223	3	2.51	2	1.0487	0.0559	0.8954	0.7433
P1420_004_Ap_A_1_POS_25	13	2.9121e-05	0.026663	7.76453e-07	0.0017276	2.53104e-15	137.041	39.1013	2	2.39	3	1.2226	0.0285	0.7489	0.7314
P1420_004_Ap_A_1_POS_35	31	3.3975e-05	0.037668	1.27977e-06	0.0025953	7.77489e-15	197.339	38.1096	4	2.38	5	1.1118	0.1263	0.762	0.7309
P1420_004_Ap_A_1_POS_22	28	3.8828e-05	0.025593	9.93725e-07	0.0016437	4.07319e-15	228.983	45.87	3	2.72	3	0.7972	0.1766	1.0262	0.7248
P1420_004_Ap_A_1_POS_1	11	2.718e-05	0.017793	4.83614e-07	0.0014887	1.63724e-15	185.472	58.1208	3	2.27	2	0.6047	0.1255	1.2698	0.7204
P1420_004_Ap_A_1_POS_13	14	3.3975e-05	0.014915	5.06737e-07	0.0011958	1.65058e-15	224.598	62.7853	2	3.11	2	0.7541	0.221	1.0249	0.6968
pooled (13) Q=13%	291	0.000415462		1.05568e-05		5.05949e-14	224.097	14.488		2.42846		1.0519	0.105462	0.842646	0.751231
JP019, Imperial Fm. (siltstone) Norman Wells Quarry section, ~0.73 %Ro, 65.266 N 126.738 W
Kinetic population #1 (rmr0 >0.85)
1318_001__Ap_a_01_30	19	1.1648e-05	0.150282	1.75049e-06	0.0048966	3.25306e-15	132.748	30.855	4	2.49	9		0.0124996		0.859
1318_001__Ap_a_01_9	62	1.1648e-05	0.434312	5.05887e-06	0.012744	2.20351e-14	149.692	19.7014	4	2.43	37		0.0436985		0.8541
1318_001__Ap_a_01_15	19	1.7473e-05	0.123539	2.1586e-06	0.0039172	4.68475e-15	107.859	25.0569	4	2.06	7		0.0314856		0.8186
1318_001__Ap_a_01_3	4	1.359e-05	0.062131	8.4436e-07	0.016963	5.31428e-14	58.2747	33.2151	4	2.97	3
1318_001__Ap_a_01_4	25	1.359e-05	0.131436	1.78622e-06	0.025877	1.23671e-13	170.67	47.9983	4	1.95	15
1318_001__Ap_a_01_35	26	7.7656e-06	0.202846	1.57522e-06	0.0062129	2.32776e-15	200.799	40.0249	4	2.16	10		0.032899		0.8524
1318_001__Ap_a_01_14	39	1.9414e-05	0.119369	2.31742e-06	0.0037158	5.20397e-15	204.672	33.5949	4	2.26	7		0.0276722		0.8522
pooled (7) Q=10%	194	9.51286e-05		1.54912e-05		2.14318e-13	152.921	12.2143		2.33143		#DIV/0!	0.029651	#DIV/0!	0.84726
Kinetic population #2 (0.74 < rmr0 < 0.85)
1598A_22	172	1.9414e-05	0.40644	7.89063e-06	0.0198729	1.48852e-13	263.882	24.3811	3	1.86868	82.9397
1598A_27	123	1.45605e-05	0.349816	5.09349e-06	0.0161526	5.53144e-14	291.702	30.0242	4	2.11828	69.3523
1598A_37	16	1.55312e-05	0.0354654	5.5082e-07	0.00127256	3.90628e-16	349.303	88.45	3	1.65902	6.99538	1.7603	0.0054	0.2343	0.8492
1598A_39	10	1.74726e-05	0.0261964	4.57719e-07	0.0010716	3.50577e-16	264.469	84.4668	3	1.59911	4.76957	1.8895	0.0035	0.107	0.8482
1598A_35	112	1.74726e-05	0.192877	3.37007e-06	0.00561878	9.63828e-15	398.118	40.0285	4	1.58913	37.5661	1.7353	0.0082	0.2565	0.8415
1598A_11	66	1.35898e-05	0.158083	2.14831e-06	0.00650333	7.81085e-15	368.871	48.343	3	1.61908	32.4785	1.7028	0.0394	0.2578	0.8275
1598A_8	156	1.9414e-05	0.305734	5.93551e-06	0.010751	4.35642e-14	316.856	28.3028	4	1.76884	59.5061	1.6961	0.0223	0.2816	0.8214
1598A_16	111	1.45605e-05	0.225184	3.27879e-06	0.00683319	9.89918e-15	405.319	41.0589	4	1.90862	46.333	1.2401	0.0234	0.7365	0.8145
1598A_25	25	2.42675e-05	0.0531475	1.28976e-06	0.00232865	3.19344e-15	235.179	48.3416	4	1.98849	10.6748	1.5168	0.0667	0.4165	0.8136
1598A_5	48	1.74726e-05	0.0851516	1.48782e-06	0.00520169	8.26046e-15	386.819	61.0353	4	1.79879	16.9433	1.9045	0.0353	0.0602	0.7973
1598A_29	29	1.9414e-05	0.0443092	8.60218e-07	0.00161417	9.82033e-16	403.676	76.7428	4	2.13825	8.53981	1.3437	0.0914	0.5649	0.7937
1598A_17	30	2.28114e-05	0.0385895	8.80282e-07	0.00125997	8.26092e-16	407.942	76.0254	3	2.27802	7.44962	0.7546	0.0742	1.1712	0.7885
1598A_31	33	1.9414e-05	0.0494579	9.60176e-07	0.00225774	1.92122e-15	411.289	74.3955	3	1.90862	10.811	1.3601	0.1627	0.4772	0.7868
1598A_10	5	2.37822e-05	0.0107685	2.56097e-07	0.000417753	9.87055e-17	236.851	106.408	2	1.69895	1.8079	1.8663	0.0458	0.0879	0.7829
1598A_33	15	1.16484e-05	0.0519481	6.05113e-07	0.00221221	6.64026e-16	299.259	78.5019	3	1.94855	10.4022	1.7932	0.0904	0.1164	0.7814
1598A_15	40	2.42675e-05	0.0639162	1.55109e-06	0.0025045	3.69395e-15	311.041	50.9835	4	1.74887	13.4002	1.3089	0.2484	0.4427	0.7599
1598A_21	34	2.9121e-05	0.0376931	1.09766e-06	0.0016953	2.43728e-15	371.825	66.271	4	1.88865	7.81302	1.5065	0.0563	0.4372	0.7544
1598A_40	38	2.18407e-05	0.0709269	1.5491e-06	0.00295543	4.16654e-15	296.211	49.9043	4	2.49767	18.0335	1.2322	0.227	0.5407	0.7516
1598A_6	24	1.74726e-05	0.0531778	9.29154e-07	0.00232998	1.65737e-15	311.53	65.2864	4	2.07834	57.6891	1.1983	0.3534	0.4483	0.7507
1598A_12	18	2.71796e-05	0.0253336	6.88556e-07	0.00117044	1.012e-15	315.199	75.9244	4	1.79879	4.95218	1.7006	0.2155	0.0839	0.7477
1598A_2	20	1.65019e-05	0.0393472	6.49303e-07	0.00224001	1.36637e-15	369.81	85.5955	3	1.81876	7.08622	1.4788	0.0449	0.4763	0.7442
1598A_34	15	1.16484e-05	0.0576927	6.72028e-07	0.00313331	1.33211e-15	270.077	71.4291	3	2.71732	11.8104	1.118	0.2275	0.6546	0.7377
1598A_24	16	1.79579e-05	0.0368057	6.60955e-07	0.0017684	1.00849e-15	292.397	74.6275	3	1.87866	6.76825	1.3139	0.127	0.559	0.7364
1598A_36	10	1.21338e-05	0.0366415	4.44598e-07	0.00161146	3.82323e-16	272.111	87.0186	4	2.53761	6.99538	1.2804	0.218	0.5016	0.7013
1318_001__Ap_a_01_5	22	1.7473e-05	0.0467413	8.1671e-07	0.0015875	7.69418e-16	324.555	70.317	4	2.23	4		0.0430442		0.8522
1318_001__Ap_a_01_12	7	1.7473e-05	0.017339	3.02965e-07	0.00091099	2.53374e-16	279.366	106.727	3	2.57	1		0.0264829		0.8505
1318_001__Ap_a_01_6	38	7.7656e-06	0.144777	1.12428e-06	0.0045517	1.24939e-15	404.687	67.2757	4	1.98	12		0.0641199		0.8463
1318_001__Ap_a_01_22	70	1.7473e-05	0.140632	2.45726e-06	0.0045947	6.44539e-15	342.739	42.9247	4	2.12	10		0.0719484		0.8403
1318_001__Ap_a_01_37	22	1.4561e-05	0.0444066	6.46604e-07	0.0015378	5.01397e-16	407.291	88.2851	4	2.41	4		0.0912575		0.8397
1318_001__Ap_a_01_32	59	1.2134e-05	0.208836	2.53402e-06	0.0064589	6.14222e-15	281.474	38.0122	4	2.17	11		0.0820708		0.8386
1318_001__Ap_a_01_34	13	9.707e-06	0.0435611	4.22848e-07	0.0015606	2.29484e-16	369.129	103.447	2	2.23	3		0.0828053		0.8272
1318_001__Ap_a_01_24	53	1.4561e-05	0.186639	2.71766e-06	0.0058783	7.32632e-15	236.592	33.6192	4	2.35	11		0.0585632		0.8253
1318_001__Ap_a_01_11	45	7.2803e-06	0.281386	2.04857e-06	0.0085669	3.88997e-15	265.881	40.7423	4	2.61	21		0.148349		0.8148
1318_001__Ap_a_01_29	40	1.9414e-05	0.112604	2.18609e-06	0.0034855	4.57889e-15	222.228	36.0325	4	2.18	8		0.0984357		0.8007
1318_001__Ap_a_01_20	33	1.5531e-05	0.0713577	1.10826e-06	0.002187	1.15371e-15	357.83	63.5834	4	1.85	6		0.0857861		0.7979
1318_001__Ap_a_01_39	46	2.9121e-05	0.0785603	2.28776e-06	0.0027864	6.58415e-15	243.794	37.2367	4	2.3	5		0.185946		0.7973
1318_001__Ap_a_01_40	59	2.4268e-05	0.0915482	2.22169e-06	0.0030099	5.33546e-15	320.077	43.3725	4	2.58	5		0.193614		0.7969
1318_001__Ap_a_01_26	22	1.4561e-05	0.0496092	7.22359e-07	0.001674	5.94146e-16	365.765	79.2329	3	1.88	3		0.176117		0.7916
1318_001__Ap_a_01_31	24	1.7473e-05	0.078036	1.36352e-06	0.0027018	2.22865e-15	213.912	44.4594	4	2.48	6		0.245516		0.7897
1318_001__Ap_a_01_33	27	1.1648e-05	0.109712	1.27792e-06	0.0038897	2.05274e-15	255.931	50.2993	4	3	5		0.230565		0.784
1318_001__Ap_a_01_17	50	1.1648e-05	0.2745	3.19737e-06	0.0084789	9.75398e-15	190.397	27.7784	4	1.97	20		0.0465108		0.783
1318_001__Ap_a_01_2	18	2.3297e-05	0.033035	7.69615e-07	0.0013309	9.61371e-16	282.718	67.7996	4	2.56	3		0.136386		0.7812
1318_001__Ap_a_01_13	24	1.6987e-05	0.0770532	1.3089e-06	0.0025568	1.88637e-15	222.686	46.2307	4	2.62	4		0.169347		0.7792
1318_001__Ap_a_01_25	1	1.4561e-05	0.00825261	1.20166e-07	0.00042747	3.8743e-17	102.021	102.174	1	2.38	1		0.152934		0.7736
1318_001__Ap_a_01_36	14	7.7656e-06	0.0798748	6.20276e-07	0.0026568	4.25665e-16	273.04	73.704	4	2.17	6		0.156687		0.7724
1318_001__Ap_a_01_38	37	1.7473e-05	0.0934123	1.63219e-06	0.0029681	2.68963e-15	274.204	46.184	4	2.77	6		0.161825		0.7649
1318_001__Ap_a_01_16	16	1.7473e-05	0.0539678	9.4298e-07	0.0098787	2.97944e-14	206.329	64.0414	4	1.98	5
1318_001__Ap_a_01_27	9	1.4561e-05	0.0194959	2.8388e-07	0.0041748	3.69533e-15	380.317	150.837	4	2.42	1
1318_001__Ap_a_01_23	8	1.9414e-05	0.0103357	2.00658e-07	0.00038714	5.64893e-17	474.74	169.007	4	2.04	1		0.0217275		0.8534
pooled (49) Q=1%	1923	0.000842572		7.66218e-05		4.07459e-13	302.898	9.19417		2.13684		1.4864	0.113705	0.405105	0.796247
central age							308.1	10.1							dispersion = 13%
Kinetic population #3 (rmr0 < 0.74)
1598A_4	216	1.9414e-05	0.236727	4.59582e-06	0.0135665	6.93692e-14	556.08	50.4957	2	1.83873	48.4511	1.5785	0.1666	0.2549	0.8097
1598A_3	38	2.18407e-05	0.0384612	8.40021e-07	0.00208199	2.06772e-15	536.072	92.195	3	1.73889	8.72151	1.4899	0.0331	0.477	0.8095
1598A_9	35	1.9414e-05	0.0399258	7.75119e-07	0.00148672	8.3308e-16	535.133	93.1345	3	1.69895	7.81302	1.5238	0.123	0.3533	0.8054
1598A_30	8	1.21338e-05	0.00961244	1.16635e-07	0.0003283	1.58683e-17	796.296	283.215	3	1.88865	1.97142	1.6544	0.1339	0.2117	0.7611
1598A_13	24	1.55312e-05	0.0253352	3.93486e-07	0.000718061	1.24375e-16	712.792	147.467	3	1.94855	5.31467	1.1186	0.3415	0.54	0.7236
1598A_18	27	2.62089e-05	0.0294553	7.7199e-07	0.00127249	1.11227e-15	418.309	82.8582	4	2.32794	5.72349	1.0888	0.2158	0.6955	0.7215
1598A_38	35	1.16484e-05	0.0878297	1.02308e-06	0.0027132	9.98843e-16	409.456	70.7514	3	1.84871	18.6695	1.3221	0.2459	0.432	0.7212
1598A_20	35	1.35898e-05	0.0494703	6.72291e-07	0.00259653	1.24513e-15	613.202	109.106	4	2.36788	10.5385	1.236	0.1975	0.5665	0.7197
1598A_32	25	1.74726e-05	0.0406109	7.09579e-07	0.00136439	5.68323e-16	421.292	85.7831	3	1.9785	8.04014	1.5727	0.222	0.2053	0.7196
1598A_23	58	1.74726e-05	0.0656653	1.14734e-06	0.00307109	2.87939e-15	596.222	83.8125	4	1.9785	13.6728	1.1414	0.2393	0.6193	0.7062
1598A_19	78	3.10624e-05	0.0569851	1.77009e-06	0.00257338	6.38967e-15	522.737	64.4299	4	2.6674	11.765	1.0368	0.3678	0.5954	0.6753
1598A_14	41	1.9414e-05	0.0363825	7.0633e-07	0.00118258	5.27097e-16	680.108	109.196	4	2.49767	7.31335	0.6161	0.2507	1.1332	0.6512
1598A_28	22	1.9414e-05	0.041656	8.08709e-07	0.00150706	8.56031e-16	327.686	71.1126	3	2.15822	8.35811	1.1162	0.4032	0.4806	0.6381
1598A_1	69	1.45605e-05	0.123946	1.80472e-06	0.00422137	3.77798e-15	455.936	57.6442	4	1.49927	22.894
1598A_7	99	1.21338e-05	0.181932	2.20752e-06	0.00527305	4.09368e-15	531.632	56.4457	4	1.83873	37.3389
1318_001__Ap_a_01_7	10	1.4561e-05	0.0141537	2.06092e-07	0.00052077	5.75009e-17	573.319	182.821	4	2.17	1		0.0300132		0.8153
1318_001__Ap_a_01_1	9	1.2134e-05	0.0184713	2.2413e-07	0.00080207	9.4718e-17	478.027	160.925	4	2.69	1		0.134691		0.7949
1318_001__Ap_a_01_8	21	1.1648e-05	0.0239084	2.78485e-07	0.00078343	8.32728e-17	870.329	192.704	4	2.64	2		0.161359		0.7844
1318_001__Ap_a_01_18	78	2.6209e-05	0.0773669	2.02771e-06	0.0024158	4.00888e-15	458.629	54.5121	4	2.74	5		0.274495		0.7756
1318_001__Ap_a_01_28	19	1.4561e-05	0.0359955	5.2413e-07	0.0014828	4.66173e-16	433.069	101.25	4	2.67	2		0.35844		0.6906
pooled (20) Q=12%	947	0.000350424		2.16033e-05		9.95692e-14	520.121	20.813		2.15933		1.26887	0.216628	0.504977	0.740161
10FNARL008, Imperial Fm. (lithic arenite) Carcajou River section, ~0.74 %Ro, 64.752 N, 126.778 W
Kinetic population #1 (rmr0 > 0.86)
P1392_015_Ap_A_1_POS_16	0	1.2134e-05	0.0090524	1.09842e-07	0.00037844	2.10864e-17	0		1	1.67	1	1.86389	0.0277543	-	0.8593
P1392_015_Ap_A_1_POS_23	1	1.7473e-05	0.012432	2.17224e-07	0.00054017	8.90832e-17	37.9716	38.0129	1	2.11	1	1.93878	0.0268799	-	0.8578
P1392_015_Ap_A_1_POS_22	0	1.2134e-05	0.0072108	8.74958e-08	0.0003551	1.85656e-17	0		1	1.59	1	1.90805	0.0286914	-	0.8548
P1392_015_Ap_A_1_POS_7	2	2.4268e-05	0.073923	1.79396e-06	0.0013498	1.07302e-15	9.21623	6.52091	3	1.83	7	1.88611	0.0203934	-	0.8541
pooled (4) Q=21%	3	6.6009e-05		2.20853e-06		1.20175e-15	11.2276	6.48748		1.8		1.89921	0.0259297		0.8565
Kinetic population #2 (0.76 < rmr0 < 0.86)
P1392_015_Ap_A_1_POS_10	17	1.4561e-05	0.24109	3.51051e-06	0.003377	2.41793e-15	39.9374	9.72613	3	1.81	27	1.90471	0.0366817	-	0.8537
P1392_015_Ap_A_1_POS_5	56	2.3297e-05	0.42255	9.84415e-06	0.0064963	2.29051e-14	46.8896	6.35744	4	2.29	51	1.97167	0.0283305	-	0.8521
P1392_015_Ap_A_1_POS_27	20	1.1648e-05	0.39826	4.63893e-06	0.0070852	6.81094e-15	35.5681	8.0013	4	1.92	42	1.89745	0.0535065	-	0.8492
P1392_015_Ap_A_1_POS_18	2	9.707e-06	0.075867	7.36441e-07	0.0013527	1.72414e-16	22.4276	15.8684	1	2.37	9	1.95435	0.0456464	-	0.8481
P1392_015_Ap_A_1_POS_24	7	2.3297e-05	0.049968	1.1641e-06	0.00085836	3.99889e-16	49.5545	18.7681	3	1.9	6	1.98397	0.0111815	-	0.8477
P1392_015_Ap_A_1_POS_0	12	1.7473e-05	0.13034	2.27743e-06	0.0024706	1.86354e-15	43.4429	12.5896	4	1.92	14	1.8563	0.0624049	-	0.8441
P1392_015_Ap_A_1_POS_25	7	1.7473e-05	0.045064	7.87403e-07	0.00083278	2.11736e-16	73.1278	27.7007	2	1.8	5	1.94612	0.0538804	-	0.8184
P1392_015_Ap_A_1_POS_21	16	3.3975e-05	0.068927	2.34179e-06	0.0013846	2.21293e-15	56.2758	14.1467	4	1.81	7	1.79582	0.174921	-	0.8118
P1392_015_Ap_A_1_POS_26	7	1.2134e-05	0.11058	1.34178e-06	0.0018695	5.14587e-16	43.0145	16.2906	4	1.78	13	1.79168	0.208318	-	0.8102
P1392_015_Ap_A_1_POS_9	17	3.1062e-05	0.10153	3.15372e-06	0.0023213	5.19902e-15	44.4401	10.8524	4	1.9	11	1.74512	0.180645	-	0.8076
P1392_015_Ap_A_1_POS_15	2	9.707e-06	0.035953	3.48996e-07	0.0009847	9.13646e-17	47.2351	33.435	2	2.36	4	1.93602	0.0639778	-	0.8052
P1392_015_Ap_A_1_POS_17	3	9.707e-06	0.027124	2.63293e-07	0.0010211	9.82441e-17	93.578	54.1654	2	2.32	3	1.82454	0.157198	-	0.7995
P1392_015_Ap_A_1_POS_4	0	1.9414e-05	0.0079349	1.54048e-07	0.00032986	4.101e-17	0		1	1.8	1	1.82038	0.162107	-	0.7863
P1392_015_Ap_A_1_POS_1	2	9.707e-06	0.023586	2.28949e-07	0.00072615	4.96847e-17	71.8646	50.8788	1	1.84	3	1.85254	0.147462	-	0.7862
P1392_015_Ap_A_1_POS_3	1	1.4561e-05	0.024495	3.56672e-07	0.00088852	1.67385e-16	23.1525	23.1711	1	1.78	3	1.82947	0.170532	-	0.7756
P1392_015_Ap_A_1_POS_11	10	3.1062e-05	0.048306	1.50048e-06	0.0015309	2.26127e-15	54.8992	17.4726	4	2.04	5	1.83028	0.0960397	-	0.7728
P1392_015_Ap_A_1_POS_19	18	9.707e-06	0.22683	2.20184e-06	0.0058707	3.24751e-15	67.2769	15.9936	4	2.08	28	1.64002	0.359982	-	0.7575
P1392_015_Ap_A_1_POS_2	33	2.3297e-05	0.27391	6.38128e-06	0.0040069	8.71399e-15	42.6399	7.48404	4	2.2	35	1.85689	0.143104	-	0.6179
pooled (18) Q=84%	230	0.000321789		4.12318e-05		5.73785e-14	45.9825	3.14261		1.99556		1.85763	0.119773		0.802439
Kinetic population # 3 (rmr0 < 0.76)
P1392_015_Ap_A_1_POS_8	6	1.5531e-05	0.024007	3.72853e-07	0.00051488	6.39456e-17	131.77	53.9155	3	1.98	3	1.80291	0.180355	-	0.7703
P1392_015_Ap_A_1_POS_6	25	1.4561e-05	0.044057	6.41514e-07	0.0010522	2.34736e-16	314.587	63.59	3	2.8	6	1.56661	0.433394	-	0.6689
P1392_015_Ap_A_1_POS_12	5	1.1648e-05	0.024879	2.89791e-07	0.0012405	2.08784e-16	141.179	63.5735	4	1.95	3	1.40623	0.59377	-	0.6101
P1392_015_Ap_A_1_POS_20	18	1.2134e-05	0.053031	6.43478e-07	0.0007709	8.74992e-17	227.355	53.829	3	2.27	7	1.59189	0.408111	-	0.4771
pooled (4) Q=12%	54	5.3874e-05		1.94764e-06		5.94964e-16	225.382	31.0378		2.25		1.59191	0.403908		0.6316
Husky6, Imperial Fm. (fine grain sandstone) Redstone River section, ~1.67 %Ro, 63.954 N, 125.047 W
Kinetic population #1 (rmr0 > 0.81)
P943_06_AP_A_1_POS_2	5	5.8242e-06	0.136014	7.92172e-07	0.0179393	1.09165e-14	41.9798	19.6378	3	1.31667	57.79	2.0396	0.0092	0	0.860938
P943_06_AP_A_1_POS_3	15	1.45605e-05	0.073444	1.06938e-06	0.0075449	1.20687e-14	92.9244	26.0608	4	1.3425	31.21	1.8889	0.0414	0.0697	0.847143
P943_06_AP_A_1_POS_4	15	9.707e-06	0.12607	1.22376e-06	0.0122013	1.40275e-14	81.2756	22.6213	4	1.8075	53.57	1.9307	0.1038	0	0.837677
P943_06_AP_A_1_POS_5	10	7.7656e-06	0.0942507	7.31913e-07	0.00681223	2.79852e-15	90.53	29.5656	3	1.67	40.05	1.6866	0.0353	0.278	0.835599
P943_06_AP_A_1_POS_6	12	7.7656e-06	0.193444	1.50221e-06	0.00965411	5.62049e-15	53.0843	15.6807	3	1.40667	82.19	1.9629	0.0058	0.0313	0.826768
P943_06_AP_A_1_POS_7	2	5.8242e-06	0.0283914	1.65357e-07	0.00292008	2.89242e-16	80.206	57.3914	1	1.69	12.06	2.0979	0.0263	0	0.819795
P943_06_AP_A_1_POS_9	4	9.707e-06	0.0407475	3.95536e-07	0.00323651	9.87018e-16	67.1299	34.0807	2	1.775	17.31	1.2212	0.024	0.7547	0.815519
pooled (7) Q=68%	63	6.11541e-05		5.88033e-06		4.67079e-14	71.0963	9.71106		1.57262		1.83254	0.0351143	0.161957	0.834777
Kinetic population #2 (rmr0 < 0.81)
P943_06_AP_A_1_POS_8	20	7.7656e-06	0.114921	8.92434e-07	0.0118573	8.47861e-15	147.833	36.8334	4	1.595	48.83	1.647	0.1141	0.2389	0.817348
P943_06_AP_A_1_POS_1	2	1.74726e-05	0.0048237	8.42826e-08	0.00062779	1.20322e-16	156.429	112.626	1	1.28	2.05	2.3031	0.0029	0	0.861194
P943_06_AP_A_1_POS_10	37	7.7656e-06	0.19599	1.52198e-06	0.018451	2.053e-14	160.21	30.9512	4	1.9275	83.27	1.3554	0.1947	0.4499	0.787694
P943_06_AP_A_1_POS_11	0	4.36815e-06	0.036792	1.60713e-07	0.00323692	1.99921e-16	0	61.69	1	0.99	15.63	4.9048	0.0361	0	0.789933
P943_06_AP_A_1_POS_12	1	5.8242e-06	0.0082447	4.80188e-08	0.000661081	1.48246e-17	137.485	138.024	1	1.78	3.5	1.8045	0.0319	0.1636	0.774011
P943_06_AP_A_1_POS_13	41	7.28025e-06	0.300414	2.18709e-06	0.022696	2.73017e-14	123.892	21.9994	4	1.655	127.64	1.1986	0.1362	0.6653	0.769699
P943_06_AP_A_1_POS_14	24	7.28025e-06	0.182124	1.32591e-06	0.0167041	1.47889e-14	119.665	27.1594	4	1.6425	77.39	1.77	0.1597	0.0703	0.748662
P943_06_AP_A_1_POS_15	9	2.03847e-05	0.028554	5.82065e-07	0.003272	4.44872e-15	102.358	36.2868	3	2.17333	12.13	1.2778	0.3174	0.4049	0.708826
P943_06_AP_A_1_POS_16	1	7.28025e-06	0.00959816	6.9877e-08	0.000809791	3.47567e-17	94.7925	95.1969	1	1.43	4.08	1.4262	0.3288	0.245	0.682955
P943_06_AP_A_1_POS_17	15	4.8535e-06	0.215387	1.04538e-06	0.0256904	1.55472e-14	95.0424	27.2701	4	1.935	91.52
pooled (5) Q=50%	150	9.02751e-05		7.91775e-06		9.1465e-14	125.19	12.2397		1.64083		1.96527	0.146867	0.248656	0.771147
Kinetic population #3 (poorly defined)
P943_06_AP_A_1_POS_18	54	1.74726e-05	0.050442	8.81353e-07	0.0039322	4.72048e-15	396.395	63.9519	4	1.335	21.43	2.1935	0.0028	0	0.862219
P943_06_AP_A_1_POS_19	3	2.9121e-06	0.0291471	8.48794e-08	0.00238148	4.80958e-17	231.632	135.35	1	1.4	12.38	0.4379	0.0211	1.541	0.828147
P943_06_AP_A_1_POS_20	7	4.8535e-06	0.0406474	1.97282e-07	0.00505189	6.01198e-16	232.52	92.9315	2	1.575	17.27	2.2088	0.0745	0	0.824386
P943_06_AP_A_1_POS_21	5	7.28025e-06	0.011743	8.54921e-08	0.00124431	8.20631e-17	378.899	174.73	2	1.32	4.99	1.8004	0.0622	0.1374	0.816368
P943_06_AP_A_1_POS_22	2	5.8242e-06	0.0110804	6.45345e-08	0.0017221	1.00598e-16	203.549	147.568	2	1.805	4.71
P943_06_AP_A_1_POS_23	5	2.9121e-06	0.044271	1.28922e-07	0.00382458	1.24045e-16	253.731	115.968	2	1.945	18.81
pooled (6) Q=66%	76	4.12548e-05		1.44246e-06		5.67648e-15	342.32	45.0501		1.56333		1.66015	0.04015	0.4196	0.83278
Husky7, Imperial Fm. (fine grain sandstone) Redstone River section, ~1.67 %Ro, 63.916 N, 125.198W
Kinetic population #1 (rmr0 > 0.85)
P943_07_AP_A_1_POS_34	7	1.69872e-05	0.12959	2.20138e-06	0.010909	3.43412e-14	20.5146	7.97952	2	1.34	56.86	2.4114	0.0029	0	0.860629
P943_07_AP_A_1_POS_37	1	7.7656e-06	0.057079	4.43253e-07	0.0095172	5.46221e-15	14.5616	14.7723	1	1.18	25.04	2.165	0.0029	0	0.848368
P943_07_AP_A_1_POS_32	16	1.35898e-05	0.23342	3.17213e-06	0.019666	7.14263e-14	32.5106	8.65969	2	1.33	102.41	2.0452	0.0171	0	0.857739
P943_07_AP_A_1_POS_33	7	1.9414e-05	0.04819	9.35561e-07	0.0038156	5.48726e-15	48.1675	18.6849	2	0.945	21.14	1.9632	0.0057	0.0314	0.858053
P943_07_AP_A_1_POS_22	7	7.7656e-06	0.081247	6.30932e-07	0.0079103	3.77343e-15	71.2957	27.9501	2	1.255	35.65	2.0808	0.0057	0	0.853681
P943_07_AP_A_1_POS_38	8	1.9414e-05	0.067915	1.3185e-06	0.0077238	2.2485e-14	39.088	14.588	2	1.155	29.8	2.1353	0.0029	0	0.853114
P943_07_AP_A_1_POS_25	8	1.01924e-05	0.12408	1.26467e-06	0.011006	1.25837e-14	40.7466	14.928	4	1.3525	54.44	1.8284	0.0028	0.1679	0.849999
P943_07_AP_A_1_POS_11	7	5.8242e-06	0.12289	7.15736e-07	0.0088925	2.68238e-15	62.8892	24.3118	2	1.205	53.92	1.7445	0.0172	0.238	0.849724
P943_07_AP_A_1_POS_24	21	7.7656e-06	0.26445	2.05361e-06	0.021829	2.87354e-14	65.7409	15.5272	4	1.3725	116.03	1.8852	0.0201	0.0944	0.846946
P943_07_AP_A_1_POS_26	4	1.16484e-05	0.078329	9.12408e-07	0.0066274	5.95962e-15	28.2664	14.3717	2	1.58	34.37	1.6123	0.0083	0.3793	0.840173
pooled (10) Q=86%	86	0.000120367		1.36482e-05		1.92937e-13	40.5889	4.80527		1.2715		1.74875	0.0142	0.23685	0.84356
Kinetic population #2 (0.76 < rmr0 < 0.85)
P943_07_AP_A_1_POS_6	17	7.7656e-06	0.1814	1.40868e-06	0.020656	2.57302e-14	77.5129	20.9632	2	1.635	79.59	1.6298	0.0232	0.347	0.841112
P943_07_AP_A_1_POS_28	24	1.9414e-05	0.080241	1.5578e-06	0.0056584	1.20675e-14	98.7914	21.6422	3	1.3	35.21	1.8525	0.0642	0.0832	0.834673
P943_07_AP_A_1_POS_1	11	7.7656e-06	0.069136	5.36883e-07	0.0050381	1.53068e-15	131.052	40.9359	2	1.125	30.34	1.7748	0.0403	0.1847	0.833777
P943_07_AP_A_1_POS_4	1	7.7656e-06	0.01351	1.04913e-07	0.00077793	3.64948e-17	61.2991	61.442	1	1.35	5.93	1.4328	0.0356	0.5324	0.831119
P943_07_AP_A_1_POS_35	3	7.7656e-06	0.023799	1.84814e-07	0.0018175	1.99204e-16	104.047	60.7154	2	1.785	10.44	1.4599	0.0457	0.4947	0.830403
P943_07_AP_A_1_POS_15	12	1.45605e-05	0.045657	6.64789e-07	0.0023675	1.18832e-15	115.598	34.1697	2	1.525	20.03	1.5144	0.0344	0.4504	0.829241
P943_07_AP_A_1_POS_31	30	1.35898e-05	0.1284	1.74493e-06	0.012352	2.81774e-14	110.149	23.0892	2	1.26	56.34	0.3262	0.0802	1.593	0.823236
P943_07_AP_A_1_POS_5	4	1.69872e-05	0.022001	3.73736e-07	0.0033515	3.24134e-15	68.7902	36.0449	2	1.535	9.65	1.212	0.0086	0.7803	0.804385
P943_07_AP_A_1_POS_12	20	1.01924e-05	0.12779	1.30248e-06	0.008818	8.07772e-15	98.4666	23.3251	4	1.6625	56.07	1.5079	0.1587	0.3341	0.798114
P943_07_AP_A_1_POS_20	1	1.16484e-05	0.010292	1.19885e-07	0.00072699	7.17116e-17	53.6755	53.8454	2	1.775	4.52	1.3545	0.0826	0.5619	0.794553
P943_07_AP_A_1_POS_13	23	7.7656e-06	0.2096	1.62767e-06	0.015992	1.54225e-14	90.6682	20.4058	2	1.575	91.97
pooled (11) Q=97%	146	0.00012522		9.62658e-06		9.5743e-14	97.2639	9.34681		1.5025		1.40648	0.05735	0.53617	0.822061
Kinetic population #3 (rmr0 < 0.76)
P943_07_AP_A_1_POS_40	3	2.42675e-05	0.002732	6.62988e-08	0.00027235	4.36822e-17	285.956	167.869	2	1.395	1.2	1.9577	0.0029	0.0404	0.860913
P943_07_AP_A_1_POS_36	5	1.9414e-05	0.0045741	8.88016e-08	0.00064886	1.58684e-16	353.935	166.566	2	1.44	2.01	1.7109	0.0776	0.2114	0.829874
P943_07_AP_A_1_POS_2	23	9.707e-06	0.060034	5.8275e-07	0.009497	8.49851e-15	250.118	66.1067	4	1.5675	26.34	1.5131	0.0486	0.438	0.820215
P943_07_AP_A_1_POS_30	10	1.9414e-05	0.018675	3.62556e-07	0.0020395	1.56775e-15	175.809	59.1718	4	2.145	8.19	1.6916	0.1043	0.2043	0.800446
P943_07_AP_A_1_POS_27	46	1.9414e-05	0.065197	1.26573e-06	0.0054317	1.11199e-14	230.661	39.9731	4	1.665	28.61	1.0607	0.1391	0.8	0.796641
P943_07_AP_A_1_POS_7	11	9.707e-06	0.026304	2.55333e-07	0.0010643	1.06733e-16	272.536	83.5129	3	1.91667	11.54	1.1352	0.1721	0.6937	0.758742
P943_07_AP_A_1_POS_8	56	7.7656e-06	0.15616	1.21268e-06	0.0060041	2.17393e-15	291.697	41.9554	2	1.93	68.52	1.4803	0.4464	0.0736	0.751168
P943_07_AP_A_1_POS_10	3	9.707e-06	0.0059888	5.81333e-08	0.00044069	1.82994e-17	325.125	189.607	2	1.825	2.63	1.0697	0.0671	0.8632	0.747142
P943_07_AP_A_1_POS_16	4	1.21338e-05	0.0084477	1.02502e-07	0.00056137	4.63968e-17	247.354	125.096	2	1.985	3.71	1.3264	0.3001	0.3743	0.735661
P943_07_AP_A_1_POS_39	21	1.74726e-05	0.04581	8.0042e-07	0.0029324	2.62519e-15	167.341	38.5499	4	2.2675	20.1	1.1249	0.3173	0.5576	0.71024
pooled (10) Q=69%	182	0.000149002		4.79521e-06		2.63591e-14	240.703	21.5199		1.81367		1.40705	0.16755	0.42565	0.781104
Note: Ns is the number of spontaneous fission tracks for each apatite. Ωi is the area overwhich tracks are counted, whereas Pi is the 238U/43Ca ratio. Q represents the chi-squared probability for each population. A population passes the chi-squared test if Q > 5%. Dpar is the diameter of the etch figure parallel to the c axis. F, Cl and OH concentrations were calculated from weight % oxide using …
	JPCPC3; JPCPC4; 10FNARL008		HUSKY7	JP019	HUSKY6
modified zeta	8.2727		12.9235	12.357	13.3455
s.e. (zeta)	0.1407		0.475237	0.225136	0.50521
total decay const.	1.55125e-10		1.55125e-10	1.55125e-10	1.55125e-10
g	1		0.5	1	0.5
